# Supplementary material for: Widespread dieback of riparian trees on a dammed ephemeral river and evidence of local mitigation by tributary flows
Source: PeerJ. 2016 Oct 27;4:e2622. doi: 10.7717/peerj.2622 (PMC5088575; doi:10.7717/peerj.2622)
Supplement: Supplemental Information 7 [file peerj-04-2622-s007.xlsx]

## Sheet: Ana Delta6
Intercept	Dryness	Distance	Elevation	Land	Mesquite	Tributary	df	logLik	AICc	delta	weight	retained
1.03	0.5545			+	1.779	+	8	-134.069	284.7	0	0.514	✔
1.082	0.5688		0.1297	+	1.813	+	9	-133.615	285.9	1.23	0.277
1.05	0.5526	0.08275		+	1.77	+	9	-133.895	286.5	1.79	0.209
