# Supplementary material for: Widespread dieback of riparian trees on a dammed ephemeral river and evidence of local mitigation by tributary flows
Source: PeerJ. 2016 Oct 27;4:e2622. doi: 10.7717/peerj.2622 (PMC5088575; doi:10.7717/peerj.2622)
Supplement: Supplemental Information 8 [file peerj-04-2622-s008.xlsx]

## Sheet: Mesquite Delta6
Intercept	Dryness	Distance	Elevation	Land	Tributary	df	logLik	AICc	delta	weight	retained
-1.766			0.2911	+		6	-157.826	327.8	0	0.239	✔
-1.609	-0.3877		0.2859	+		7	-157.308	328.9	1.03	0.143
-1.727				+		5	-159.421	329	1.13	0.135	✔
-1.934			0.2922	+	+	7	-157.669	329.6	1.75	0.099
-1.568	-0.3822			+		6	-158.868	329.9	2.08	0.084
-1.757	-0.3794		0.2869	+	+	8	-157.177	330.7	2.84	0.058
-1.882				+	+	6	-159.275	330.7	2.9	0.056
-1.726		-0.005205		+		6	-159.42	331	3.19	0.048
-1.703	-0.3754			+	+	7	-158.746	331.8	3.91	0.034
-1.565	-0.3848	-0.01802		+		7	-158.861	332	4.14	0.03
-2.347			0.337			4	-162.019	332.1	4.28	0.028	✔
-1.881		-0.005172		+	+	7	-159.274	332.8	4.96	0.02
-2.328	0.2786		0.3325			5	-161.762	333.7	5.82	0.013
-1.7	-0.3781	-0.01781		+	+	8	-158.739	333.8	5.97	0.012
