# Supplementary material for: Widespread dieback of riparian trees on a dammed ephemeral river and evidence of local mitigation by tributary flows
Source: PeerJ. 2016 Oct 27;4:e2622. doi: 10.7717/peerj.2622 (PMC5088575; doi:10.7717/peerj.2622)
Supplement: Supplemental Information 9 — ‘site’: ID of site; ‘transect’: ID of transect within each site; ‘quadrat’: ID of quadrat within each transect; ‘median.perc75’: median dieback per quadrat 1 = high dieback ≥ 75%, 2 = low dieback < 70% (binary); landtenure: 1 = private, 2 = communal, 3 = park (nominal); trib: 1 = tributary, 2 = no tributary (nominal); mesquite: proportion of mesquite; elev.s: standardised elevation; dist.s: standardised distance; arid.s: standardised dryness. [file peerj-04-2622-s009.xlsx]

## Sheet: Fa Raw Data
site	transect	quadrat	median.perc75	landtenure	trib	mesquite	elev.s	dist.s	arid.s
10	1	Q	1	2	1	1	-0.0907676	0.184828	-0.756348
10	2	H	0	2	1	0	-0.51829	-0.948065	-0.756348
10	2	J	0	2	1	0	-0.485293	-0.696995	-0.756348
10	2	K	0	2	1	0	-0.394911	-0.571951	-0.756348
10	2	L	0	2	1	0	-0.356176	-0.446846	-0.756348
10	3	B	0	2	1	0	-0.501074	-1.04998	-0.756348
10	3	J	0	2	1	0	-0.195496	-0.0844484	-0.756348
10	3	K	0	2	1	0	-0.0348167	0.0353669	-0.756348
10	4	G	0	2	1	0	-0.502509	-1.01769	-0.756348
10	4	H	0	2	1	0.04	-0.469512	-1.00933	-0.756348
10	4	I	0	2	1	0.61	-0.412127	-0.885943	-0.756348
10	4	J	0	2	1	0	-0.412127	-0.762745	-0.756348
11	2	E	1	2	0	0	-0.287313	-0.586528	-0.762356
11	3	C	0	2	0	0	-0.4566	-0.185258	-0.762356
11	3	H	0	2	0	0	-0.380565	-0.783904	-0.762356
1	1	F	0	3	1	0	-0.366218	-0.879977	1.3544
1	1	K	0	3	1	0	-0.350437	-0.757702	1.3544
1	1	O	1	3	1	0	-0.350437	-0.265647	1.3544
1	1	S	1	3	1	0	0.0713465	0.22573	1.3544
12	1	I	1	1	0	1	-0.463774	-0.924754	2.71769
12	1	J	1	1	0	0	-0.468077	-1.05404	2.71769
12	1	V	1	1	0	0	0.35397	0.412834	2.71769
12	2	H	1	1	0	1	-0.130937	0.248672	2.71769
12	2	J	1	1	0	1	-0.171107	0.00707374	2.71769
1	2	A	0	3	1	0	-0.291617	-0.165268	1.3544
1	2	I	0	3	1	0	-0.384868	-0.992842	1.3544
1	2	O	1	3	1	1	-0.0663788	-0.258328	1.3544
13	3	O	1	1	0	0	0.856094	0.472803	4.0687
1	3	B	0	3	1	0	-0.364784	-0.44537	1.3544
14	1	AB	1	3	0	0	0.339624	2.34243	-0.0369697
14	1	H	1	3	0	0	-0.363349	-0.186242	-0.0369697
14	1	M	1	3	0	0	-0.25862	0.449984	-0.0369697
14	1	T	0	3	0	0	-0.36048	1.33802	-0.0369697
14	1	U	0	3	0	0	-0.23997	1.46368	-0.0369697
14	2	AA	0	3	0	0	0.206202	2.10692	-0.0369697
14	2	G	1	3	0	0	-0.466643	-0.297631	-0.0369697
14	2	J	1	3	0	0	-0.427908	0.0538804	-0.0369697
14	2	M	1	3	0	0	-0.396346	0.421999	-0.0369697
14	2	U	0	3	0	0	-0.113722	1.38175	-0.0369697
14	3	I	1	3	0	0	-0.4193	-0.817363	-0.0369697
14	3	J	0	3	0	0	-0.516855	-0.945728	-0.0369697
14	3	N	1	3	0	0	-0.328918	-0.699086	-0.0369697
14	4	AA	1	3	0	0	0.536169	2.08563	-0.0369697
14	4	I	1	3	0	0	-0.0290782	-0.142511	-0.0369697
14	4	N	1	3	0	0	0.240634	0.473972	-0.0369697
1	4	B	1	3	1	0	-0.175411	-0.603812	1.3544
1	4	O	1	3	1	0	-0.295921	0.0391803	1.3544
1	4	P	0	3	1	0	-0.35761	0.168652	1.3544
15	1	D	0	3	1	0	-0.435081	-0.71477	-0.0384927
15	1	O	0	3	1	0	0.676764	0.62983	-0.0384927
15	1	Q	1	3	1	0	0.883352	0.876103	-0.0384927
15	1	T	0	3	1	0	1.32235	1.24637	-0.0384927
15	1	U	0	3	1	0	1.39695	1.37056	-0.0384927
15	1	V	0	3	1	0	1.49881	1.4948	-0.0384927
15	2	A	0	3	1	0	-0.502509	-1.06942	-0.0384927
15	2	L	1	3	1	0	1.33096	0.265402	-0.0384927
15	2	M	0	3	1	0	1.43138	0.388293	-0.0384927
15	2	Q	0	3	1	0	1.83882	0.881085	-0.0384927
15	2	T	1	3	1	0	2.31799	1.25019	-0.0384927
15	2	U	0	3	1	0	2.46432	1.3689	-0.0384927
15	3	A	0	3	1	0.62	-0.49677	-1.06198	-0.0384927
15	3	B	0	3	1	0	-0.389172	-0.941607	-0.0384927
15	3	I	1	3	1	0	0.339624	-0.11268	-0.0384927
15	3	M	1	3	1	0	0.586382	0.364797	-0.0384927
15	3	O	1	3	1	0	0.671025	0.607319	-0.0384927
15	3	S	1	3	1	0	0.917783	1.0832	-0.0384927
15	4	AI	1	3	1	0	4.03238	2.81812	-0.0384927
15	4	AP	0	3	1	0	2.18744	3.67595	-0.0384927
15	4	AQ	0	3	1	0	5.31208	3.79405	-0.0384927
15	4	AR	1	3	1	0	5.37377	3.90962	-0.0384927
15	4	AS	1	3	1	0	5.60331	4.01855	-0.0384927
15	4	AT	0	3	1	0	5.61909	4.13061	-0.0384927
15	4	AW	0	3	1	0	5.87876	4.49529	-0.0384927
15	4	AX	0	3	1	0	6.06096	4.61166	-0.0384927
15	4	D	0	3	1	0	-0.390607	-0.926845	-0.0384927
15	4	G	0	3	1	0.32	-0.250012	-0.571336	-0.0384927
15	4	I	0	3	1	0	0.0311766	-0.334166	-0.0384927
16	1	C	1	3	1	0	-0.294486	0.358155	0.0888497
16	1	E	0	3	1	0	-0.462339	0.123998	0.0888497
16	1	P	0	3	1	0.81	-0.31744	-0.954647	0.0888497
16	1	R	0	3	1	0	-0.194062	-0.716984	0.0888497
16	2	P	1	3	1	1	-0.361914	0.77025	0.0888497
16	2	Q	1	3	1	1	-0.225624	0.902121	0.0888497
16	3	A	0	3	1	0	-0.522594	-0.75641	0.0888497
17	1	B	1	3	1	0	-0.435081	-0.627492	0.141606
17	1	D	0	3	1	0	-0.373391	-0.887727	0.141606
17	1	J	0	3	1	0	-0.417865	-0.519978	0.141606
17	1	K	1	3	1	0	-0.274401	-0.396657	0.141606
17	1	M	1	3	1	0	-0.291617	-0.148046	0.141606
17	1	O	1	3	1	0	-0.257186	0.0956435	0.141606
17	1	P	0	3	1	0.93	-0.0936369	0.211953	0.141606
17	2	C	0	3	1	0	-0.294486	-0.805431	0.141606
17	2	L	1	3	1	0	0.104343	0.292711	0.141606
17	2	M	0	3	1	0	0.272196	0.410927	0.141606
17	3	K	0	3	1	0	-0.0262089	-0.0410246	0.141606
17	4	H	0	3	1	0	-0.422169	-0.49599	0.141606
17	4	T	0	3	1	0	0.0125263	0.98048	0.141606
18	1	H	1	3	0	0	-0.109418	-0.350158	0.184081
18	2	J	0	3	0	0	-0.301659	-0.591941	0.184081
18	4	I	0	3	0	0	-0.392042	-0.983186	0.184081
18	4	Y	1	3	0	0	0.081389	0.825729	0.184081
19	2	N	0	3	1	0	-0.110853	0.153521	0.173589
19	2	S	1	3	1	0	0.0928661	0.758933	0.173589
19	3	U	0	3	1	0	-0.0405553	-0.000491595	0.173589
19	3	V	1	3	1	0	0.00678777	0.116679	0.173589
19	4	Q	0	3	1	0	-0.409257	-0.126827	0.173589
19	4	R	1	3	1	0	-0.383434	-0.0100251	0.173589
19	4	T	1	3	1	0	-0.206973	0.217796	0.173589
19	4	U	1	3	1	0	-0.125199	0.330107	0.173589
20	1	J	1	1	0	1	-0.196931	0.00633566	-0.697542
20	1	L	1	1	0	1	-0.0778559	-0.248056	-0.697542
20	1	M	1	1	0	1	0.0110917	-0.372792	-0.697542
20	1	O	1	1	0	0	0.0283073	-0.635119	-0.697542
20	1	P	1	1	0	0	0.104343	-0.766559	-0.697542
20	1	Q	1	1	0	0	0.110082	-0.891541	-0.697542
20	1	R	1	1	0	0	-0.0477285	-1.00957	-0.697542
20	2	AA	0	1	0	0	-0.244274	-0.0500661	-0.697542
20	2	AD	1	1	0	0	-0.244274	0.318975	-0.697542
20	2	AM	0	1	0	0.5	-0.0118625	1.38796	-0.697542
20	2	L	1	1	0	1	-0.387738	-0.295417	-0.697542
20	2	M	1	1	0	0	-0.340395	-0.414986	-0.697542
20	2	O	1	1	0	0	-0.364784	-0.649081	-0.697542
20	2	Q	1	1	0	0	-0.196931	-0.8948	-0.697542
20	2	R	1	1	0	0	-0.250012	-1.01326	-0.697542
21	1	C	0	1	1	0	-0.524028	-0.937363	-0.847434
21	1	F	0	1	1	0	-0.224189	-0.856851	-0.847434
21	1	G	0	1	1	0	-0.115156	-0.737774	-0.847434
21	1	H	0	1	1	0	-0.139545	-0.619496	-0.847434
21	1	K	1	1	1	0	0.17464	-0.260542	-0.847434
21	1	L	1	1	1	0	0.121559	-0.14331	-0.847434
21	1	M	1	1	1	0	0.160294	-0.0262014	-0.847434
21	2	B	0	1	1	0	-0.4566	-0.764652	-0.847434
21	2	D	1	1	1	0	-0.539809	-1.01265	-0.847434
21	2	F	0	1	1	0	-0.307398	-0.885882	-0.847434
21	2	G	0	1	1	0	-0.313137	-0.765083	-0.847434
21	2	I	0	1	1	0	-0.118026	-0.520778	-0.847434
21	2	J	1	1	1	0	-0.109418	-0.400839	-0.847434
21	2	K	0	1	1	0	-0.143849	-0.282131	-0.847434
21	2	L	1	1	1	0	-0.163934	-0.159241	-0.847434
21	2	M	1	1	1	0	-0.301659	-0.0364731	-0.847434
21	3	G	0	1	1	0	-0.513986	-0.767112	-0.847434
21	3	H	0	1	1	0	-0.304529	-0.64539	-0.847434
21	3	I	0	1	1	0	-0.198365	-0.524099	-0.847434
21	3	J	0	1	1	0	-0.198365	-0.401085	-0.847434
21	3	L	0	1	1	0	-0.130937	-0.155058	-0.847434
21	4	D	0	1	1	0	-0.39778	-0.833724	-0.847434
21	4	E	0	1	1	0	-0.470947	-0.952494	-0.847434
21	4	I	0	1	1	0.08	-0.053467	-0.709542	-0.847434
21	4	L	1	1	1	1	0.0957353	-0.342162	-0.847434
2	1	L	1	3	0	0	0.356839	0.188949	0.75323
22	1	M	0	1	0	0	-0.173977	0.3437	-0.269317
22	1	P	1	1	0	1	-0.0262089	0.723689	-0.269317
22	1	Q	1	1	0	0	0.151686	0.847195	-0.269317
22	1	R	1	1	0	0	0.210506	0.973653	-0.269317
22	2	F	0	1	0	0.15	-0.472381	0.022881	-0.269317
22	3	B	1	1	0	1	-0.270097	0.04121	-0.269317
22	3	D	1	1	0	0	-0.272967	-0.207277	-0.269317
22	3	F	0	1	0	0	-0.209843	-0.45392	-0.269317
22	3	H	1	1	0	0	-0.184019	-0.699209	-0.269317
22	4	A	1	1	0	0	-0.508247	-1.05017	-0.269317
22	4	B	1	1	0	0	-0.381999	-0.971684	-0.269317
22	4	E	0	1	0	0	-0.486728	-0.605718	-0.269317
2	2	M	1	3	0	0	0.303758	-0.477231	0.75323
23	1	E	1	1	1	0	-0.425038	-0.892156	-0.644448
23	1	P	0	1	1	0	-0.435081	0.076884	-0.644448
23	2	J	1	1	1	1	-0.225624	0.751614	-0.644448
23	2	Q	0	1	1	0	-0.314571	-0.101547	-0.644448
23	4	AH	0	1	1	0	0.0885621	2.82913	-0.644448
23	4	T	0	1	1	0	0.00104921	1.13972	-0.644448
23	4	Z	1	1	1	0	0.0526962	1.87085	-0.644448
24	1	D	0	2	0	0.05	-0.435081	-0.939577	-0.728638
24	1	F	0	2	0	0.01	-0.407823	-0.692136	-0.728638
24	1	M	0	2	0	0	-0.512551	0.180584	-0.728638
24	1	N	0	2	0	0	-0.45947	0.304213	-0.728638
24	1	O	0	2	0	0	-0.396346	0.426427	-0.728638
24	1	R	0	2	0	0	-0.272967	0.793315	-0.728638
24	2	E	1	2	0	0	-0.406388	-0.152167	-0.728638
24	2	F	1	2	0	0	-0.387738	-0.278748	-0.728638
24	2	G	0	2	0	0	-0.393476	-0.401024	-0.728638
24	2	M	0	2	0	0	-0.529767	-1.01252	-0.728638
24	2	N	0	2	0	0	-0.4566	-0.885882	-0.728638
24	2	R	0	2	0	0	-0.297356	-0.400163	-0.728638
24	2	S	0	2	0	0	-0.0520324	-0.278994	-0.728638
24	3	A	1	2	0	0.68	-0.148153	-0.769696	-0.728638
24	3	B	1	2	0	0.18	-0.374826	-0.894124	-0.728638
24	3	E	0	2	0	0	-0.531202	-0.891725	-0.728638
24	3	L	0	2	0	0	-0.237101	-0.0329672	-0.728638
24	3	O	0	2	0	0	-0.0132972	0.337304	-0.728638
24	3	P	0	2	0	0	0.0369152	0.460256	-0.728638
24	3	Q	0	2	0	0	0.0670426	0.580932	-0.728638
24	4	C	0	2	0	0	-0.412127	-0.7903	-0.728638
24	4	D	0	2	0	0.35	-0.400649	-0.677374	-0.728638
24	4	E	0	2	0	0	-0.468077	-0.562356	-0.728638
24	4	H	0	2	0	0	-0.366218	-0.206355	-0.728638
24	4	I	0	2	0	0	-0.407823	-0.0862321	-0.728638
24	4	N	0	2	0	0	-0.49677	0.536647	-0.728638
24	4	P	1	2	0	1	-0.305963	0.781629	-0.728638
24	4	R	0	2	0	0.92	-0.435081	1.02735	-0.728638
24	4	S	0	2	0	0.49	-0.340395	1.14544	-0.728638
24	4	T	0	2	0	0.03	-0.304529	1.26501	-0.728638
2	4	G	1	3	0	0	-0.267228	-0.781566	0.75323
4	4	C	1	1	1	1	-0.278705	-0.416585	2.33794
5	1	I	1	1	1	0	-0.0764212	-0.0731926	1.80971
5	1	K	1	1	1	0	-0.155326	0.174188	1.80971
5	1	L	1	1	1	0	-0.0821598	0.297078	1.80971
5	2	H	1	1	1	1	-0.113722	-0.251132	1.80971
5	2	I	1	1	1	1	0.00678777	-0.126273	1.80971
5	2	J	1	1	1	0.63	-0.00755862	-0.00338241	1.80971
5	2	K	1	1	1	1	-0.0262089	0.119324	1.80971
5	2	L	1	1	1	0	0.0397844	0.242214	1.80971
5	2	O	1	1	1	0	0.122993	0.616299	1.80971
5	3	L	0	1	1	0	-0.330352	-0.554914	1.80971
5	3	N	1	1	1	0	-0.0305128	-0.309194	1.80971
5	4	P	1	1	1	1	-0.129503	0.714279	1.80971
5	4	Q	1	1	1	1	0.141644	0.835263	1.80971
5	4	R	1	1	1	0.69	0.153121	0.957354	1.80971
6	1	Q	1	1	1	0	0.0670426	0.0575093	2.19046
6	1	R	1	1	1	0	0.100039	0.177755	2.19046
6	1	V	0	1	1	0	0.15599	0.667226	2.19046
6	1	Y	1	1	1	0	0.17464	1.03159	2.19046
6	2	S	1	1	1	0	0.600728	1.09113	2.19046
6	3	Y	0	1	1	0	-0.211277	1.76002	2.19046
6	4	Q	1	1	1	1	-0.00612398	0.432024	2.19046
7	1	A	1	1	0	0	-0.413561	0.383495	1.68989
7	1	H	0	1	0	0	-0.359045	-0.477292	1.68989
7	1	I	0	1	0	0.94	-0.367653	-0.598153	1.68989
7	2	A	1	1	0	0	-0.305963	0.128058	1.68989
7	2	B	1	1	0	0	-0.232797	0.00332183	1.68989
7	2	C	1	1	0	0	-0.331787	-0.121414	1.68989
7	2	D	1	1	0	1	-0.35761	-0.248549	1.68989
7	4	C	1	1	0	1	-0.506813	-1.05539	1.68989
7	4	E	1	1	0	1	-0.466643	-0.842766	1.68989
7	4	G	1	1	0	0	-0.453731	-0.593663	1.68989
7	4	H	1	1	0	1	-0.25862	-0.468804	1.68989
8	1	G	1	2	1	0.22	-0.356176	0.0559101	-0.747929
8	1	H	0	2	1	0.47	-0.392042	-0.0712244	-0.747929
8	1	I	0	2	1	0	-0.409257	-0.196268	-0.747929
8	1	K	0	2	1	0	-0.479555	-0.446477	-0.747929
8	1	L	0	2	1	0	-0.506813	-0.576749	-0.747929
8	2	G	0	2	1	0.62	-0.492466	-0.857281	-0.747929
8	2	H	0	2	1	0.55	-0.509682	-0.976912	-0.747929
8	2	J	0	2	1	0	-0.475251	-0.942837	-0.747929
8	2	K	0	2	1	0	-0.509682	-0.826712	-0.747929
8	2	L	0	2	1	0	-0.480989	-0.708681	-0.747929
8	2	O	1	2	1	0	-0.43795	-0.350158	-0.747929
8	3	G	0	2	1	0	-0.522594	-0.835938	-0.747929
8	3	H	0	2	1	0	-0.361914	-0.716123	-0.747929
8	3	I	0	2	1	0	-0.251447	-0.595262	-0.747929
8	3	J	0	2	1	0	-0.214147	-0.479876	-0.747929
8	3	K	0	2	1	0.59	-0.189758	-0.361598	-0.747929
8	3	M	0	2	1	0.25	-0.139545	-0.127872	-0.747929
8	3	N	0	2	1	0	-0.224189	-0.0104557	-0.747929
8	3	P	0	2	1	0	-0.202669	0.233972	-0.747929
8	4	M	0	2	1	0.75	-0.334656	-0.383925	-0.747929
9	1	C	0	2	0	0	-0.432212	-0.771172	-0.837027
9	1	D	0	2	0	0	-0.505378	-0.895415	-0.837027
9	1	G	0	2	0	0	-0.508247	-0.891787	-0.837027
9	1	M	0	2	0	0	-0.328918	-0.151368	-0.837027
9	1	P	0	2	0	0	-0.0233396	0.20857	-0.837027
9	2	C	0	2	0	0	-0.311702	-0.781935	-0.837027
9	2	G	0	2	0	0	-0.433646	-0.887727	-0.837027
9	2	M	0	2	0	0	-0.399215	-0.154197	-0.837027
9	2	N	0	2	0	0	-0.294486	-0.0370881	-0.837027
9	3	C	0	2	0	0	-0.449427	-0.825974	-0.837027
9	3	D	0	2	0	0	-0.427908	-0.944805	-0.837027
9	3	K	0	2	0	0.03	-0.211277	-0.355632	-0.837027
9	4	C	0	2	0	0	-0.473816	-0.425011	-0.837027
9	4	F	0	2	0	0	-0.33896	-0.778553	-0.837027
