# Supplementary material for: Widespread dieback of riparian trees on a dammed ephemeral river and evidence of local mitigation by tributary flows
Source: PeerJ. 2016 Oct 27;4:e2622. doi: 10.7717/peerj.2622 (PMC5088575; doi:10.7717/peerj.2622)
Supplement: Supplemental Information 10 — ‘site’: ID of site; ‘transect’: ID of transect within each site; ‘quadrat’: ID of quadrat within each transect; ‘median.perc75’: median dieback per quadrat 1 = high dieback ≥ 75%, 2 = low dieback < 70% (binary); landtenure: 1 = private, 2 = communal, 3 = park (nominal); trib: 1 = tributary, 2 = no tributary (nominal); elev.s: standardised elevation; dist.s: standardised distance; arid.s: standardised dryness. [file peerj-04-2622-s010.xlsx]

## Sheet: Pg Raw Data
site	transect	quadrat	median.perc75	landtenure	trib	elev.s	dist.s	arid.s
10	1	A	0	2	1	0.169396	-0.422492	-1.01243
10	1	B	0	2	1	0.715983	-0.586413	-1.01243
10	1	C	0	2	1	0.715983	-0.750659	-1.01243
10	1	Q	0	2	1	0.111352	0.301656	-1.01243
10	2	M	0	2	1	-0.372353	-0.368095	-1.01243
10	2	P	0	2	1	-0.140175	0.124725	-1.01243
10	2	Q	0	2	1	0.643427	0.292061	-1.01243
10	3	A	1	2	1	-1.23818	-1.23364	-1.01243
10	3	M	0	2	1	0.551523	0.443135	-1.01243
10	3	O	0	2	1	1.02072	0.770571	-1.01243
10	4	E	0	2	1	-0.232079	-0.969221	-1.01243
10	4	H	0	2	1	-1.16563	-1.27698	-1.01243
10	4	I	0	2	1	-0.972147	-1.11387	-1.01243
11	1	A	0	2	0	-1.31074	-1.33715	-1.01624
11	1	D	0	2	0	-1.01568	-0.900595	-1.01624
11	1	F	0	2	0	-0.865732	-0.571858	-1.01624
11	1	G	0	2	0	-0.778665	-0.41493	-1.01624
11	2	C	0	2	0	-0.88508	-1.04777	-1.01624
11	3	A	0	2	0	-1.31558	0.134889	-1.01624
11	3	B	0	2	0	-1.20433	-0.025048	-1.01624
11	4	H	0	2	0	-0.130501	-0.892952	-1.01624
1	1	A	0	3	1	-1.0834	-0.292152	0.326897
12	1	AB	0	1	0	2.80075	1.55367	1.19194
12	1	AC	0	1	0	3.24576	1.70897	1.19194
12	1	H	0	1	0	-0.904428	-0.993532	1.19194
12	1	I	0	1	0	-1.14628	-1.16518	1.19194
12	1	J	1	1	0	-1.16079	-1.33609	1.19194
12	1	K	0	1	0	-0.106315	-1.22421	1.19194
12	1	L	0	1	0	1.18518	-1.06224	1.19194
12	1	M	0	1	0	1.37866	-0.899131	1.19194
12	1	N	0	1	0	1.37866	-0.736511	1.19194
12	1	P	0	1	0	1.43187	-0.402652	1.19194
12	1	W	1	1	0	1.8672	0.764961	1.19194
12	1	X	1	1	0	2.24449	0.927337	1.19194
12	1	Y	0	1	0	2.45248	1.08418	1.19194
12	2	AA	1	1	0	-0.290123	-0.0517177	1.19194
12	2	AB	0	1	0	-0.145012	0.112366	1.19194
12	2	G	0	1	0	0.0823294	0.547538	1.19194
12	2	H	0	1	0	-0.0240856	0.386056	1.19194
12	2	I	0	1	0	-0.0144115	0.224981	1.19194
12	2	J	0	1	0	-0.159523	0.0666698	1.19194
12	2	K	0	1	0	-0.135338	-0.0940802	1.19194
12	2	L	0	1	0	-0.0579449	-0.258245	1.19194
12	2	M	0	1	0	0.0146108	-0.42241	1.19194
12	2	N	0	1	0	0.0146108	-0.585031	1.19194
12	2	O	0	1	0	-0.0385968	-0.746431	1.19194
12	2	P	0	1	0	0.101678	-0.903847	1.19194
12	2	W	1	1	0	-0.411049	-0.705695	1.19194
12	2	X	0	1	0	-0.440072	-0.543318	1.19194
12	2	Y	0	1	0	-0.241753	-0.383138	1.19194
12	3	D	0	1	0	-0.551324	0.386056	1.19194
12	3	F	0	1	0	-0.556161	0.0542294	1.19194
12	3	G	0	1	0	-0.333657	-0.112456	1.19194
12	3	H	0	1	0	-0.0240856	-0.275158	1.19194
12	3	I	0	1	0	-0.32882	-0.434282	1.19194
12	3	J	0	1	0	-0.0385968	-0.585274	1.19194
12	3	K	0	1	0	0.125863	-0.73521	1.19194
12	3	L	0	1	0	0.759516	-0.891326	1.19194
12	3	M	0	1	0	0.043633	-1.02175	1.19194
12	3	R	0	1	0	0.34353	-0.733503	1.19194
12	3	T	0	1	0	0.47413	-0.406392	1.19194
12	4	A	0	1	0	-0.904428	-0.871649	1.19194
12	4	D	0	1	0	-1.2527	-1.36227	1.19194
12	4	F	0	1	0	-1.2527	-1.03232	1.19194
12	4	H	0	1	0	-1.0834	-0.69919	1.19194
12	4	J	0	1	0	-0.778665	-0.375169	1.19194
12	4	K	0	1	0	-0.449746	-0.216858	1.19194
12	4	L	0	1	0	-0.159523	-0.0556206	1.19194
12	4	M	0	1	0	0.0484701	0.104967	1.19194
12	4	Q	0	1	0	0.038796	0.75	1.19194
12	4	R	0	1	0	0.121026	0.913433	1.19194
12	4	S	0	1	0	0.116189	1.07491	1.19194
12	4	T	0	1	0	0.111352	1.23558	1.19194
12	4	U	0	1	0	0.280648	1.39812	1.19194
12	5	J	0	1	0	0.628916	-0.406148	1.19194
12	5	M	0	1	0	0.914302	0.055449	1.19194
12	5	N	0	1	0	0.449945	0.218069	1.19194
12	5	P	0	1	0	1.05941	0.535097	1.19194
12	5	R	0	1	0	0.919139	0.84871	1.19194
12	5	S	0	1	0	0.957835	1.00694	1.19194
12	5	V	0	1	0	1.53828	1.48114	1.19194
12	5	W	0	1	0	1.6447	1.64522	1.19194
12	5	X	0	1	0	2.4815	1.80776	1.19194
12	5	Y	0	1	0	3.56984	1.96071	1.19194
12	6	I	0	1	0	-0.483605	-0.55706	1.19194
12	6	J	0	1	0	-0.280449	-0.395497	1.19194
12	6	K	0	1	0	-0.0240856	-0.240926	1.19194
12	6	L	0	1	0	-0.169197	-0.0855427	1.19194
12	6	M	0	1	0	0.377389	0.0736625	1.19194
12	6	N	0	1	0	0.793375	0.227745	1.19194
12	6	O	0	1	0	1.19485	0.384917	1.19194
12	6	P	0	1	0	1.3448	0.549164	1.19194
12	6	R	0	1	0	0.319345	0.867899	1.19194
12	6	S	0	1	0	0.304834	1.03507	1.19194
12	6	W	0	1	0	0.420923	1.69035	1.19194
12	6	X	0	1	0	1.53828	1.85362	1.19194
12	6	Y	0	1	0	2.59759	2.00681	1.19194
1	2	O	0	3	1	0.193581	-0.284183	0.326897
13	1	E	0	1	0	-0.0192486	-0.632841	2.04919
13	1	F	1	1	0	0.299997	-0.471359	2.04919
13	1	G	0	1	0	0.517664	-0.31256	2.04919
13	1	H	0	1	0	0.561197	-0.153681	2.04919
13	1	I	0	1	0	0.648264	0.00893964	2.04919
13	1	J	0	1	0	0.817561	0.17156	2.04919
13	1	K	0	1	0	0.774027	0.335887	2.04919
13	1	L	0	1	0	0.725657	0.500296	2.04919
13	1	V	0	1	0	0.711146	2.08218	2.04919
13	2	G	0	1	0	0.836909	-0.314512	2.04919
13	2	H	0	1	0	0.619242	-0.152054	2.04919
13	2	I	0	1	0	0.590219	0.0132491	2.04919
13	2	J	0	1	0	0.749842	0.184082	2.04919
13	2	K	0	1	0	0.619242	0.350605	2.04919
13	4	A	0	1	0	-1.05921	-1.31658	2.04919
13	4	B	0	1	0	-0.715783	-1.15558	2.04919
13	4	C	0	1	0	-0.652902	-0.992963	2.04919
13	4	D	0	1	0	-0.696435	-0.831319	2.04919
13	4	E	0	1	0	-0.691598	-0.669674	2.04919
13	4	G	0	1	0	-0.643228	-0.342564	2.04919
13	4	K	0	1	0	-0.37719	0.294907	2.04919
13	4	L	0	1	0	-0.0385968	0.458097	2.04919
13	4	M	0	1	0	-0.473931	0.615432	2.04919
1	3	H	0	3	1	-1.02535	-1.23486	0.326897
1	3	N	0	3	1	-0.957636	-0.265563	0.326897
14	1	P	0	3	0	-0.793176	1.15094	-0.555966
14	2	I	0	3	0	-0.981821	-0.027162	-0.555966
14	3	AF	0	3	0	2.63145	2.19081	-0.555966
14	3	AG	0	3	0	2.90233	2.36002	-0.555966
14	3	H	0	3	0	-0.657739	-0.860753	-0.555966
14	3	O	0	3	0	-0.406212	-0.700491	-0.555966
14	4	AD	0	3	0	1.82367	3.32298	-0.555966
15	1	A	0	3	1	-1.26237	-1.35707	-0.556932
15	3	A	0	3	1	-1.25753	-1.34658	-0.556932
15	4	C	1	3	1	-1.14144	-1.32471	-0.556932
15	4	G	0	3	1	-0.425561	-0.69797	-0.556932
16	1	K	0	3	1	-0.783502	-0.738381	-0.47613
16	1	P	0	3	1	-0.652902	-1.20469	-0.47613
16	1	T	0	3	1	0.599893	-0.574785	-0.47613
16	2	B	0	3	1	-0.93345	-1.26958	-0.47613
16	2	O	0	3	1	-1.11242	0.904245	-0.47613
16	2	P	0	3	1	-0.80285	1.07557	-0.47613
16	2	Q	0	3	1	-0.343331	1.24989	-0.47613
16	2	R	0	3	1	-0.531976	1.42105	-0.47613
16	2	T	0	3	1	0.101678	1.75385	-0.47613
16	3	B	0	3	1	-1.38813	-1.10696	-0.47613
16	3	U	0	3	1	0.512827	1.53188	-0.47613
16	4	AA	1	3	1	1.35447	2.37295	-0.47613
16	4	B	0	3	1	-0.947962	-0.999549	-0.47613
16	4	C	0	3	1	-1.05438	-1.16111	-0.47613
16	4	I	0	3	1	0.0339589	-0.566411	-0.47613
16	4	R	0	3	1	-0.473931	0.90579	-0.47613
16	4	U	0	3	1	0.0968406	1.39999	-0.47613
17	1	N	0	3	1	-0.440072	0.027397	-0.442655
17	1	P	0	3	1	0.101678	0.337514	-0.442655
17	1	S	0	3	1	1.05458	0.823179	-0.442655
17	1	T	0	3	1	1.0836	0.988726	-0.442655
17	1	V	0	3	1	1.13197	1.32551	-0.442655
17	2	N	0	3	1	1.63986	0.762603	-0.442655
17	2	Q	0	3	1	1.81883	1.25022	-0.442655
17	2	R	0	3	1	1.84301	1.40723	-0.442655
17	3	C	0	3	1	-1.10758	-1.32072	-0.442655
17	3	L	0	3	1	0.454782	0.164974	-0.442655
17	3	M	0	3	1	0.657938	0.339384	-0.442655
17	3	N	0	3	1	0.624079	0.508997	-0.442655
17	3	O	0	3	1	1.03039	0.670235	-0.442655
17	3	P	0	3	1	1.03039	0.832855	-0.442655
17	3	Q	0	3	1	1.07876	0.995475	-0.442655
17	3	T	1	3	1	2.96521	1.47724	-0.442655
17	4	AE	0	3	1	3.11516	3.16336	-0.442655
17	4	D	0	3	1	-1.06889	-1.27007	-0.442655
17	4	K	0	3	1	-0.444909	-0.105708	-0.442655
17	4	R	0	3	1	0.17907	1.03621	-0.442655
17	4	U	0	3	1	0.662775	1.51188	-0.442655
19	2	K	1	3	1	0.135537	-0.208158	-0.422361
19	2	L	1	3	1	-0.101478	-0.0514737	-0.422361
19	2	N	1	3	1	0.043633	0.260269	-0.422361
19	4	J	0	3	1	-0.827035	-1.15989	-0.422361
20	1	A	0	1	0	-0.638391	1.55611	-0.975117
20	1	AM	0	1	0	0.551523	1.9851	-0.975117
20	1	B	1	1	0	0.135537	1.39349	-0.975117
20	1	E	1	1	0	-0.11599	0.883999	-0.975117
20	1	G	1	1	0	-0.174034	0.553392	-0.975117
20	1	H	1	1	0	-0.188545	0.390853	-0.975117
20	1	I	0	1	0	-0.188545	0.228233	-0.975117
20	1	J	0	1	0	-0.24659	0.0656941	-0.975117
20	1	K	1	1	0	0.0533071	-0.102455	-0.975117
20	1	L	0	1	0	0.154885	-0.270604	-0.975117
20	1	M	0	1	0	0.454782	-0.435501	-0.975117
20	1	N	1	1	0	1.20452	-0.605846	-0.975117
20	1	O	1	1	0	0.512827	-0.782289	-0.975117
20	1	P	1	1	0	0.76919	-0.956048	-0.975117
20	1	Q	1	1	0	0.788538	-1.12127	-0.975117
20	1	R	1	1	0	0.256463	-1.2773	-0.975117
20	2	AM	0	1	0	0.377389	1.89216	-0.975117
20	2	B	1	1	0	-1.02535	1.27778	-0.975117
20	2	E	1	1	0	-1.16563	0.797891	-0.975117
20	2	I	0	1	0	-1.07372	0.156436	-0.975117
20	2	J	1	1	0	-1.07372	-0.00618403	-0.975117
20	2	K	0	1	0	-1.0447	-0.169699	-0.975117
20	2	L	1	1	0	-0.889917	-0.333213	-0.975117
20	2	O	1	1	0	-0.812524	-0.800746	-0.975117
20	2	P	0	1	0	-0.396538	-0.962228	-0.975117
20	2	Q	1	1	0	-0.24659	-1.12558	-0.975117
20	2	R	1	1	0	-0.425561	-1.28218	-0.975117
20	3	AI	1	1	0	-1.06889	1.04711	-0.975117
20	3	AJ	0	1	0	-0.807687	1.2142	-0.975117
20	3	AK	0	1	0	-0.798013	1.37755	-0.975117
20	3	AL	0	1	0	-0.628716	1.54017	-0.975117
20	3	AM	0	1	0	-0.290123	1.70271	-0.975117
20	3	AO	0	1	0	0.275811	2.02917	-0.975117
20	3	D	1	1	0	0.812724	1.2877	-0.975117
20	3	E	0	1	0	0.759516	1.12411	-0.975117
20	3	F	0	1	0	0.619242	0.956609	-0.975117
20	3	G	1	1	0	0.140374	0.789516	-0.975117
20	3	N	0	1	0	-0.0724561	-0.350288	-0.975117
20	3	O	0	1	0	0.164559	-0.508762	-0.975117
20	3	P	1	1	0	0.372552	-0.667398	-0.975117
20	3	Q	1	1	0	0.401575	-0.830912	-0.975117
20	3	R	0	1	0	-0.261101	-0.991256	-0.975117
20	3	S	1	1	0	-0.67225	-1.15241	-0.975117
20	4	A	0	1	0	-0.411049	1.78475	-0.975117
20	4	AD	0	1	0	0.648264	0.239047	-0.975117
20	4	AJ	0	1	0	1.03523	1.20477	-0.975117
20	4	AL	1	1	0	1.44154	1.52212	-0.975117
20	4	AN	0	1	0	1.42703	1.81963	-0.975117
20	4	AO	0	1	0	1.8285	1.97721	-0.975117
20	4	F	1	1	0	0.17907	0.958235	-0.975117
20	4	G	0	1	0	-0.125664	0.788297	-0.975117
20	4	I	0	1	0	-0.749643	0.4633	-0.975117
20	4	N	0	1	0	-0.527139	-0.350614	-0.975117
20	4	O	1	1	0	-0.415886	-0.514128	-0.975117
20	4	P	1	1	0	-0.406212	-0.677643	-0.975117
20	4	Q	1	1	0	0.0968406	-0.839043	-0.975117
20	4	R	0	1	0	0.198419	-1.00792	-0.975117
20	4	S	1	1	0	-0.75448	-1.17347	-0.975117
21	1	R	0	1	1	1.46089	0.836432	-1.07023
21	1	S	0	1	1	2.57825	0.99393	-1.07023
21	2	N	0	1	1	-0.807687	0.165705	-1.07023
21	3	C	0	1	1	-0.357842	-1.12818	-1.07023
21	4	A	0	1	1	-0.96731	-0.560881	-1.07023
21	4	C	1	1	1	-0.686761	-0.886122	-1.07023
21	4	H	0	1	1	-0.299797	-1.03655	-1.07023
21	4	I	0	1	1	0.237115	-0.880674	-1.07023
21	4	J	0	1	1	0.527338	-0.721957	-1.07023
21	4	K	0	1	1	0.416086	-0.556979	-1.07023
21	4	L	0	1	1	0.740168	-0.395009	-1.07023
21	4	M	0	1	1	1.24806	-0.235478	-1.07023
2	1	G	0	3	0	0.382226	-0.500712	-0.0545635
2	1	I	1	3	0	0.580545	-0.179862	-0.0545635
22	1	P	0	1	0	0.329019	1.01401	-0.703396
22	1	T	0	1	0	2.09938	1.67295	-0.703396
22	2	D	0	1	0	-0.986658	0.421182	-0.703396
22	2	F	0	1	0	-1.1753	0.0875665	-0.703396
22	2	P	0	1	0	-0.512627	-1.20242	-0.703396
22	3	A	1	1	0	0.63859	0.274011	-0.703396
22	3	B	1	1	0	-0.493279	0.111797	-0.703396
22	4	C	0	1	0	-0.93345	-1.06411	-0.703396
2	2	C	0	3	0	0.169396	-0.595682	-0.0545635
2	2	I	0	3	0	-0.570672	-1.2112	-0.0545635
23	1	H	0	1	1	-1.03019	-1.12241	-0.941427
23	1	N	0	1	1	-1.11242	-0.160511	-0.941427
23	2	E	0	1	1	-0.357842	1.8633	-0.941427
23	2	G	0	1	1	-0.502953	1.54042	-0.941427
23	2	I	0	1	1	-0.37719	1.21249	-0.941427
23	2	J	0	1	1	-0.343331	1.05093	-0.941427
23	2	L	0	1	1	-0.396538	0.736258	-0.941427
23	2	Y	0	1	1	-1.0447	-1.35081	-0.941427
23	4	P	0	1	1	0.585382	0.952624	-0.941427
24	1	A	0	2	0	-0.93345	-1.04199	-0.994847
24	1	C	0	2	0	-1.31558	-1.35398	-0.994847
24	1	D	0	2	0	-1.04954	-1.18477	-0.994847
24	1	E	0	2	0	-0.957636	-1.02028	-0.994847
24	1	F	0	2	0	-0.957636	-0.857663	-0.994847
24	1	G	0	2	0	-1.01084	-0.6961	-0.994847
24	1	S	0	2	0	0.416086	1.27185	-0.994847
24	2	B	0	2	0	-0.401375	0.344506	-0.994847
24	2	C	0	2	0	-1.02535	0.183187	-0.994847
24	3	A	0	2	0	-0.0821302	-0.960195	-0.994847
24	3	B	0	2	0	-0.846384	-1.12469	-0.994847
24	3	C	0	2	0	-1.39781	-1.28413	-0.994847
24	3	D	0	2	0	-1.41232	-1.28129	-0.994847
24	3	H	0	2	0	-0.50779	-0.633979	-0.994847
24	3	J	0	2	0	-0.227242	-0.31752	-0.994847
24	3	K	0	2	0	0.0629812	-0.153111	-0.994847
24	3	R	0	2	0	0.870768	0.984498	-0.994847
24	3	S	0	2	0	1.57698	1.14313	-0.994847
24	4	B	0	2	0	-1.0447	-1.14623	-0.994847
24	4	D	0	2	0	-0.93345	-0.838149	-0.994847
24	4	O	0	2	0	-0.962473	0.928638	-0.994847
24	4	P	0	2	0	-0.614205	1.09061	-0.994847
24	4	R	0	2	0	-1.04954	1.41544	-0.994847
24	4	S	0	2	0	-0.730294	1.57156	-0.994847
24	4	T	0	2	0	-0.609368	1.72962	-0.994847
24	4	U	0	2	0	-0.444909	1.89216	-0.994847
24	4	V	0	2	0	-0.106315	2.0547	-0.994847
2	4	B	0	3	0	-0.860895	-0.944015	-0.0545635
2	4	G	1	3	0	-0.483605	-0.975888	-0.0545635
3	1	A	0	3	0	-1.32041	-1.31284	-0.205296
3	1	B	0	3	0	-0.914102	-1.24933	-0.205296
3	1	D	0	3	0	-0.822198	-0.919215	-0.205296
3	2	D	0	3	0	-0.923776	-0.93629	-0.205296
3	2	E	0	3	0	-0.425561	-0.793754	-0.205296
3	3	C	0	3	0	-0.904428	-1.11802	-0.205296
3	3	D	0	3	0	-0.725457	-0.959626	-0.205296
3	3	E	0	3	0	-0.725457	-0.806601	-0.205296
3	3	F	0	3	0	-0.280449	-0.651054	-0.205296
3	3	H	0	3	0	0.222604	-0.334595	-0.205296
3	3	K	0	3	0	0.2613	0.136759	-0.205296
3	3	L	0	3	0	1.09327	0.292387	-0.205296
3	3	M	1	3	0	1.43187	0.451023	-0.205296
3	3	N	1	3	0	1.48024	0.611691	-0.205296
3	3	O	0	3	0	1.75595	0.774799	-0.205296
3	3	P	0	3	0	1.94459	0.937907	-0.205296
3	4	E	0	3	0	-1.30107	-1.32593	-0.205296
3	4	M	0	3	0	0.754679	-0.0952186	-0.205296
3	4	O	0	3	0	1.04006	0.232461	-0.205296
4	1	G	0	1	1	-0.0579449	-0.986296	0.950979
4	1	K	1	1	1	-0.140175	-0.362241	0.950979
4	2	F	0	1	1	-0.662576	-1.18981	0.950979
4	2	G	0	1	1	-0.45942	-1.02589	0.950979
4	2	H	0	1	1	-0.45942	-0.863274	0.950979
4	2	K	0	1	1	0.203256	-0.375494	0.950979
4	3	C	1	1	1	-0.88508	-0.96548	0.950979
4	3	D	0	1	1	-1.27688	-1.12745	0.950979
4	3	G	0	1	1	-0.875406	-1.11306	0.950979
4	4	C	0	1	1	-0.522301	-0.493394	0.950979
4	4	D	0	1	1	-0.440072	-0.656339	0.950979
4	4	E	0	1	1	-0.251427	-0.819366	0.950979
4	4	G	1	1	1	-1.28655	-1.14257	0.950979
4	4	K	1	1	1	-0.638391	-0.932794	0.950979
5	1	B	0	1	1	-1.12693	-1.18111	0.615798
5	1	H	0	1	1	-0.0579449	-0.203849	0.615798
5	1	I	1	1	1	0.159722	-0.0394399	0.615798
5	1	J	1	1	1	0.0968406	0.124725	0.615798
5	1	N	0	1	1	0.3919	0.771791	0.615798
5	2	B	0	1	1	-1.27204	-1.27332	0.615798
5	2	H	0	1	1	0.0339589	-0.27467	0.615798
5	2	I	0	1	1	0.440271	-0.10961	0.615798
5	2	J	0	1	1	0.3919	0.0528471	0.615798
5	2	K	0	1	1	0.329019	0.215061	0.615798
5	2	M	1	1	1	0.435434	0.539976	0.615798
5	2	N	0	1	1	0.396737	0.704547	0.615798
5	3	J	0	1	1	-1.25753	-0.985889	0.615798
5	3	K	0	1	1	-1.18981	-0.833433	0.615798
5	3	P	1	1	1	1.16099	-0.0193563	0.615798
5	3	S	0	1	1	1.32061	0.464032	0.615798
5	4	N	1	1	1	0.140374	0.682268	0.615798
5	4	O	0	1	1	0.227441	0.842124	0.615798
5	4	P	0	1	1	-0.0192486	1.00157	0.615798
5	4	Q	1	1	1	0.894953	1.16151	0.615798
5	4	R	0	1	1	0.93365	1.32291	0.615798
5	4	U	1	1	1	0.788538	1.80443	0.615798
6	1	AD	1	1	1	2.11389	2.22285	0.857399
6	1	C	0	1	1	-1.15595	-0.553076	0.857399
6	1	G	1	1	1	-1.0834	-1.20356	0.857399
6	1	J	0	1	1	-0.918939	-1.03118	0.857399
6	1	K	0	1	1	-0.715783	-0.861078	0.857399
6	1	N	0	1	1	0.00977371	-0.353866	0.857399
6	1	O	0	1	1	0.00977371	-0.191246	0.857399
6	1	X	0	1	1	0.962672	1.25949	0.857399
6	1	Z	0	1	1	0.991694	1.57684	0.857399
6	2	A	0	1	1	-1.41232	-1.28129	0.857399
6	2	AA	0	1	1	3.34734	2.81918	0.857399
6	2	G	0	1	1	-0.145012	-0.457292	0.857399
6	2	K	0	1	1	0.241952	0.202458	0.857399
6	2	M	0	1	1	0.98202	0.529812	0.857399
6	2	O	0	1	1	1.48507	0.856272	0.857399
6	2	P	0	1	1	1.63502	1.01393	0.857399
6	2	Q	0	1	1	2.37993	1.17655	0.857399
6	2	R	0	1	1	2.50085	1.34112	0.857399
6	2	Z	1	1	1	2.64596	2.6568	0.857399
6	3	A	0	1	1	-1.24302	-1.21933	0.857399
6	3	B	0	1	1	-1.26237	-1.34252	0.857399
6	3	E	0	1	1	-1.05438	-0.855874	0.857399
6	3	F	0	1	1	-1.05438	-0.693254	0.857399
6	3	O	0	1	1	-0.251427	0.750894	0.857399
6	3	Q	0	1	1	-0.415886	1.0715	0.857399
6	3	R	0	1	1	-0.778665	1.24217	0.857399
6	3	S	1	1	1	-0.681924	1.41406	0.857399
6	4	H	0	1	1	0.440271	-0.865794	0.857399
6	4	K	0	1	1	0.595056	-0.378909	0.857399
6	4	Q	0	1	1	0.396737	0.628441	0.857399
6	4	S	1	1	1	1.01104	0.961813	0.857399
6	4	T	1	1	1	1.10295	1.12403	0.857399
6	4	W	1	1	1	2.33156	1.61319	0.857399
6	4	X	0	1	1	2.45732	1.77353	0.857399
7	1	B	0	1	0	-0.657739	0.401749	0.539775
7	1	I	0	1	0	-0.822198	-0.733421	0.539775
7	1	J	0	1	0	-1.0834	-0.890187	0.539775
7	1	L	0	1	0	-0.841547	-1.2025	0.539775
7	2	D	0	1	0	-0.788339	-0.271255	0.539775
7	4	C	0	1	0	-1.29139	-1.33788	0.539775
7	4	D	0	1	0	-1.23818	-1.21966	0.539775
7	4	E	0	1	0	-1.15595	-1.05679	0.539775
7	4	F	0	1	0	-1.08824	-0.893521	0.539775
7	4	H	0	1	0	-0.454583	-0.562426	0.539775
7	4	J	0	1	0	-0.454583	-0.234584	0.539775
7	4	M	0	1	0	-0.309471	0.248479	0.539775
7	4	N	1	1	0	0.116189	0.40988	0.539775
8	1	G	0	2	1	-0.783502	0.13123	-1.00709
8	1	H	0	2	1	-0.904428	-0.0368379	-1.00709
8	1	P	0	2	1	-1.35911	-1.35268	-1.00709
8	1	Q	0	2	1	0.590219	-1.17786	-1.00709
8	1	R	0	2	1	1.27224	-1.00662	-1.00709
8	2	G	0	2	1	-1.24302	-1.07598	-1.00709
8	2	H	0	2	1	-1.30107	-1.23413	-1.00709
8	2	I	0	2	1	-1.33976	-1.33878	-1.00709
8	2	Q	0	2	1	0.290322	-0.0941615	-1.00709
8	2	R	0	2	1	0.696634	0.0623604	-1.00709
8	3	A	0	2	1	-1.01084	-0.719192	-1.00709
8	3	B	0	2	1	-1.07856	-0.879942	-1.00709
8	3	C	0	2	1	-0.976984	-1.04037	-1.00709
8	3	D	0	2	1	-1.37846	-1.20087	-1.00709
8	3	K	0	2	1	-0.222405	-0.420703	-1.00709
8	3	M	0	2	1	-0.0531079	-0.111725	-1.00709
8	3	Q	0	2	1	0.401575	0.520299	-1.00709
8	3	R	0	2	1	3.55533	0.669503	-1.00709
8	4	C	0	2	1	-0.619042	-0.666666	-1.00709
8	4	D	0	2	1	-0.469094	-0.824326	-1.00709
8	4	E	0	2	1	-0.938288	-0.981824	-1.00709
8	4	F	0	2	1	-1.10275	-1.1394	-1.00709
8	4	G	0	2	1	-1.23818	-1.29918	-1.00709
8	4	H	0	2	1	-1.13177	-1.26055	-1.00709
8	4	I	0	2	1	-0.938288	-1.0946	-1.00709
8	4	J	0	2	1	-0.831872	-0.930517	-1.00709
8	4	K	0	2	1	-0.812524	-0.768873	-1.00709
8	4	L	0	2	1	-0.681924	-0.608285	-1.00709
8	4	M	0	2	1	-0.710946	-0.450218	-1.00709
8	4	Q	0	2	1	-0.517464	0.193107	-1.00709
9	1	O	0	2	0	0.0291219	0.175463	-1.06362
9	2	P	0	2	0	-0.0821302	0.32174	-1.06362
9	2	Q	0	2	0	0.377389	0.484197	-1.06362
9	3	K	0	2	0	-0.29496	-0.412816	-1.06362
9	3	L	0	2	0	0.17907	-0.254993	-1.06362
9	3	M	0	2	0	-0.372353	-0.0938363	-1.06362
9	4	L	0	2	0	-0.880243	-0.786029	-1.06362
9	4	M	0	2	0	0.135537	-0.635443	-1.06362
9	4	O	0	2	0	0.208093	-0.320041	-1.06362
